# Supplementary material
Source: publisher site journal article supplement (https://cdn.jamanetwork.com/ama/content_public/journal/jama/929991/joi140045supp1_prod.pdf)
Supplement: Supplementary file 1 [file joi140045supp1_prod.pdf]

## Supplementary Online Content

Lincoff AM, Tardif J-C, Schwartz GG, et al; for the AleCardio Investigators. Effect of aleglitazar on cardiovascular outcomes after acute coronary syndrome in patients with type 2 diabetes mellitus: the AleCardio randomized clinical trial. *JAMA*. doi:10.1001/jama.2014.3321.

**eAppendix 1.** AleCardio Investigators

**eAppendix 2.** Eligibility Criteria and End Point Definitions

**eFigure 1.** Hazard Ratios for Primary End Point in Subgroups

**eFigure 2.** Gastrointestinal Hemorrhages

**eFigure 3.** Bone Fractures

This supplementary material has been provided by the authors to give readers additional information about their work.

## eAppendix 1. AleCardio Investigators

### **Group Information:** Investigators (No. of Enrolled Patients):

**Argentina:** Marisa Liliana Vico, Inst de Invest Clin Zarate, Zarate (29); Diego Gabriel Conde, Inst Cardiovasc de Bs As, Ciudad Autonoma Buenos Aires (19); Cristian Edgardo Botta, Clin de Nefr Uro y enf cardio, Santa Fe (14); Elizabeth Gelersztein, CEDIC, Ciudad Autonoma Buenos Aires (8); Hugo Ramos, IPAC Clinica Privada Caraffa, Cordoba (8); Aldo Daniel Prado, Investigaciones Clin Tucuman, Tucuman (7); Alfredo Piombo, Hospital Cosme Argerich, Ciudad Autonoma Buenos Aires (6); Andrea Piredda, Centro Modelo de Cardiologia, San Miguel de Tucuman (6); Carlos Lorente, Sanatorio Julio Corzo, Rosario (6); Juan Pablo Cimbaro Canella, Inst de Cardio de Corrientes, Corrientes (6); Pablo Guzman, Sanatorio San Francisco, Santiago del Estero (6); Horacio Avaca, Hospital Britanico de Buenos Aires, Ciudad Autonoma de Buenos Aires (5); Laura Elena Maffei, Cons Asoc Endoc - Inv Clin Apl, Ciudad Autonoma Buenos Aires (5); Nestor Alejandro Vita, Hospital Italiano de Rosario, Rosario (5); Vanina Gorosito, Sanatorio Plaza, Rosario (5); Claudio Cosman, Universtiyersidad Maimonides, Ciudad Autonoma de Buenos Aires (4); Alberto Caccavo, Clinica Coronel Suarez, Coronel Suarez (3); Daniel Piskorz, Sanat Britanico Rosario, Rosario (3); Horacio Omar Jure, Clinica Chutro SRL, Cordoba (3); Ricardo Alcides Fernandez, Sanatorio San Geronimo, Santa Fe (2); Sebastian Saravia Toledo, Instituto Medico CENESA, Salta (2); Daniel Nul, Clinica Constituyentes, Moron (1); Javier Claudio Marino, Centro Medico Alcorta, Haedo (1); Jose Luis Navarro Estrada, Htal Italiano de Bs As, Ciudad Autonoma Buenos Aires (1); Luis Szejfman, Sanatorio Guemes, Ciudad Autonoma de Buenos Aires (1). **Australia:** John Amerena, The Geelong Hospital, Geelong (17); Leonard Arnolda, The Canberra Hospital, Canberra (10); Raibhan Yadav, The Townsville Hospital, Townsville (10); Paul Garrahy, Princess Alexandra Hospital, Brisbane (8); Sidney Lo, Liverpool Hospital, Liverpool (8); David Brieger, Concord Repat General Hospital, Concord (7); Gregory Nelson, Royal North Shore Hospital, St. Leonards (7); Margaret Arstall, Lyell McEwin Hospital, Elizabeth Vale (6); Matthew Worthley, Royal Adelaide Hospital, Adelaide (6); David Colquhoun, CORE Research Group Pty Ltd, Milton (4); Stephanie Wilson, St Vincent's Hospital Darlinghurst, Darlinghurst (3); Tuan Hoai Nguyen Dang, Wollongong Hospital, Wollongong (3); Ananth Prasan, St George Hospital, St, George, Sydney (2); Jens Kilian, Bankstown Lidcombe Hospital, Bankstown (2); Nicholas Collins, John Hunter Hospital, Newcastle (2); Ernesto Oqueli, Ballarat Health Services, Ballarat (1); Patrick Carroll, Redcliffe Hospital, Redcliffe (1). **Brazil:** Frederico De Lima E Silva, Hospital de Messejana, Fortaleza (89); Oscar Dutra, Inst Cardiologia RS, Porto Alegre (58); Marcelo Franken, InCor - Instituto do Coracao, Sao Paulo (30); Rogerio Tumelero, Hospital Sao Vicente de Paulo, Passo Fundo (26); Pedro Pimentel, Hospital Conceicao, Porto Alegre (25); Artur Herdy, I C de Sta Catarina, Sao Jose (23); Maria Sanali Paiva, Natal Hospital Center, Natal (22); Costantino Roberto Costantini Frack, Hospital Cardiologico Costantini, Curitiba (19); Fabio Rossi, Clinica Loema, Campinas (18); Lilia Maia, Hospital de Base SJRP, São José do Rio Preto (17); Adriana Forti, CE Diab Hipertensao, Fortaleza (16); Jose Francisco Saraiva, HMCP PUC Campinas, Campinas (15); Luiz Bodanese, Hospital Sao Lucas da PUCRS, Porto Alegre (15); Jordan Oliveira, Cardreserach Cardiol Assist, Belo Horizonte (14); Paulo Rossi, Nucleo de Pesq clinica, Curitiba (14); Jorge Gross, Centro de Pesq em Diabetes, Porto Alegre (13); Audes Feitosa, P S Cardiologico Pernambuco, Recife (12); Marco Wainstein, HC de POA, Porto Alegre (11); Ricardo Silva, Hospital Universitario Walter, Fortaleza (10); Delcio Silva, H U M A Pedrossian, Campo Grande (9); Roberto Botelho, I C do Triangulo Mineiro, Uberlandia (9); Euler Manenti, Hospital Mae de Deus, Porto Algre (7); Jose Airton de Arruda, Intercath H Meridional, Cariacica (7); Jose Augusto Ribas Fortes, S C M de Curitiba, Curitiba (7); Wilma Ardito, I de Molestias Card Vasculares, Sao Jose do Rio Preto (7); Raul Dos Santos Filho, Inst do Coracao HCFMUSP, Sao Paulo (6); Dalton Bertolim Precoma, S Hospitalar Angelina Caron, Campina Grande do Sul (5); Jamil Saad, Hospital Felicio Rocho, Belo Horizonte (5); Jose Antonio Jatene, ENCORE C R Intervencionista, Aparecida de Goiânia (5); Miguel Hissa, C P D E Doencas E Metabol, Fortaleza (5); Alvaro Junior, Fundacao Baiana de Cardiol, Salvador (4); Joao Borges, Centro de P C do

Brasil, Brasilia (3); Celia Sampaio, CPCLin Centro de P Clinicas, Sao Paulo (2); Gilmar Reis, Santa Casa de BH, Belo Horizonte (2); Aurora Issa, I N de Cardiol Laranjeiras, Rio de Janeiro (1); Paulo Ernesto Leaes, Sta Casa de Misericordia POA, Porto Alegre (1); Sergio Emanuel Kaiser, CCBR, Rio de Janeiro (1). **Canada:** Daniel Savard, Medi-Recherche Inc., St Jean sur Richelieu (40); Jean Claude Tardif, Montreal Heart Institute, Montreal (37); Manohara Sanaratne, Dr Senaratne Prof Corp, Edmonton (30); Gurcharan Syan, GS Cardiac Lab Medicine Profes, Sudbury (24); Simon Kouz, csss de Lanaudiere, St-Charles Borromeo (23); Jan Kornder, Surry Memorial Hospital, Surrey (22); Ariel Diaz, Centre Hospital de Trois Rivieres, Trois-Rivieres (20); Ronald Bourgeois, G A Research Associates Ltd, Moncton (15); Erick Schampaert, Hospital Sacre Coeur de Montreal, Montreal (14); Eva Lonn, Hamilton Hlth Sciences-General, Hamilton (14); Frank Nigro, Intermountain Research Clts, Thunder Bay (14); Michel Degrace, Clin de Cardiologie de Levis, Levis (14); Guiseppe Mazza, Clinique Medicale Langelier, Montréal (13); Philippe Robichaud, CSSS Haute Yamaska, Granby (13); Lawrence Title, Cap District Health Authority, Halifax (12); Dennis Rupka, Fraser Medical Clinic, New Westminster (11); Jean-Francois Baril, Hopital regional Dr Georges L Dumont, Moncton (11); Ron James Hatheway, South Shore Medical Arts, Bridgewater (11); Annie Roy, CSSS De Laval, Laval (10); Jean Pierre Lavoie, CDRC Rive-Sud, Longueuil (10); Raymond Leung, Royal Alexandra Hospital, Edmonton (10); Gerald Tremblay, CSSS Chicoutimi, Chicoutimi (9); Joel Pouliot, CSSS Vallee de l Or, Val DOr (9); Laurie Hill, Peel Research Associates, Brampton (9); Roger Labonte, Clinical Research Centre, Sudbury (9); Shahar Lavi, London Health Sciences Centre, London (9); Patrick Bergin, Queen Elizabeth Hospital, Charlottetown (8); Yves Pesant, Recherche Medicale St-Jerome, St-Jerome (8); Denis Carl Phaneuf, Centre Hospitalier Pierre-LeGa, Terrebonne (7); Gustavo Nogareda, Red Deer Regional Hospital, Red Deer (7); Stuart Smith, St Mary s General Hospital, Kitchener (7); Thao Huynh, Montreal General Hospital, Montreal (7); Anthony Rolfe, Cowan Topsail Medical Clinic, St Johns (6); James Conway, Can Cnt Research on Diabetes, Smiths Falls (6); Olivier Bertrand, IUCPQ, Quebec (6); Raja Chehayeb, ViaCar Recherche Clinique Inc, Greenfield Park (6); Shekhar Pandey, Cambridge Cardiac care, Cambridge (6); Robert Petrella, Heart Health and Exercise Lab, London (5); Serge Lepage, Centre Hospitalier Fleurimont, Sherbrooke (5); Shah Nawaz, Sudbury Cardiac Research, Sudbury (5); Amer Johri, Hotel Dieu Hospital, Kingston (4); Beth Abramson, St. Michaels Hospital, Toronto (4); Didier Fay, Recherches Cliniques Theradev, Granby (4); Gregory Searles, Dr Gregory Searles Clinic, Saint John (4); Guy Chouinard, Recherche Clinique Sigma Inc, Quebec City (4); Maynard Luterman, CL Research, Fort Erie (4); Remo Zadra, New Market Cardio Research GR, New Market (4); Robert Welsh, University of Alberta Hospital, Edmonton (3); Saul Vizel, Vizel Cardiac Research, Cambridge (3); Christian Leduc, Clinique Medicale des 3 Lacs, Vaudreuil-Dorion (2); Patrice Nault, Q T Recherche Outaouais, Gatineau (2); Philippe Beaudry, P Beaudry Med Prof Corp, Burlington (2); Asaad Bakbak, Oshawa Clinic, Oshawa (1); Faryala Shabani, Faryala Shabani, Bathurst (1); Joseph Berlingieri, JBN Medical Service, Burlington (1). **China:** Xinchun Yang, Beijing Chao yang Hospital, Beijing (42); Ruiping Zhao, Baotou Central Hospital, Baotou (35); Jianjun Peng, Beijing Shijitan Hospital, Beijing (31); Hongde Hu, West China Hospital of Sichuan Uni, Chengdu (27); Ming Luo, Tongji Hospital of Tongji Uni, Shanghai (26); Yuannan Ke, China Japan Friendship Hospital, Beijing (25); Zuyi Yuan, 1st Hospital of Xi an Jiaotong uni, Xi'an (25); Yun Zhang, Qi Lu Hospital of Shandong Uni, Jinan (22); Xiaofeng Lv, General Hospital of Beijing Military, Beijing (21); Changsheng Ma, Beijing Anzhen Hospital, Beijing (20); Genshan Ma, Zhongda Hospital, Nanjing (20); Jiyan Chen, Guangdong General Hospital, Guangzhou (20); Xiaodong Li, Shengjing Hospital of China Med Un, Shenyang (20); Zhanquan Li, The People's Hospital of Liaoning, Shenyang (20); Xiaowei Yan, Peking Union Med College Hospital, Beijing (19); Xuedong Gan, Zhongnan Hospital Wuhan University, Wuhan (18); Junzhu Chen, The 1st Aff Hospital Zhejiang Universtiy,, Hangzhou (15); Shuiping Zhao, 2nd Xiangya Hospital Central South Uni, Changsha (15); Yundai Chen, The General Hospital of PLA, Beijing (15); Hui Li, General Hospital of Daqing Oil, Daqing (14); Lang Li, 1st Aff Hospital of Guangxi Med Universtiy, Nanning (14); Li Huimin, The 254th Hospital of PLA, Tianjin (13); Ying Guo, People's Hospital Hunan Province, Changsha (13); Taohong Hu, General Hospital of 2nd Artillery, Beijing (12); Weiyi Fang, Shanghai Chest Hospital, Shanghai (12); Xiaofei Wang, 306 Hospital of PLA, Beijing (12); Kan Yang, The 3rd Xiangya Hospital, Changsha (11); Xiaomei BAO, Central Hospital of Xuhui Dist,

Shanghai (11); Guosheng Fu, The Sir Run Run Shaw Hospital, Hangzhou (10); Hongwei Li, Beijing Friendship Hospital, Beijing (10); Jing Yan, Zhejiang Hospital, Hangzhou (10); Dongmei Wang, Benthune Intl. Peace Hospital, Shijiazhuang (8); Ben HE, Renji Hospital Shanghai Jiaotong Un, Shanghai (7); Fang Zhang, Qingdao Municipal Hospital, Qingdao (7); Yaling Han, Shenyang Northern Hospital, Shenyang (7); Jun Liu, First Affiliated Hospital Dalian, Dalian (6); Meng Wei, Shanghai 6th People's Hospital, Shanghai (6); Hong Ma, First Affil Hospital Sun yat sun, Guangzhou (4); Shiyao Wu, The 9th Hospital of Shanghai, Shanghai (4); Weiming LI, Shanghai 10th Peoples Hospital, Shanghai (2); Haiming Shi, Huashan Hospital Aff to Fudan Uni, Shanghai (1). **Czech Republic:** Zdenek Monhart, Nemocnice Znojmo, Znojmo (28); Miroslav Solar, Fakultni Nemocnice HK, Hradec Kralove (23); Jan Belohlavek, VFN, Praha (19); Richard Ferkl, Poliklinika Masarykuv Dum, Trutnov (12); Rostislav Kral, Nemocnice Tabor a s, Tabor (10); Martin Hutyra, Fakultni Nemocnice, Olomouc (9); Martin Novak, Fakultni Nemocnice Brno, Brno (7); Jiri Kettner, IKEM, Prague 4 (6); Ivo Podpera, Oblastni Nemocnice Kladno, Kladno (5); Jan Malik, VFN Praha, Praha 2 (5); **DENMARK:** Ole May, Regions Hospitalet Herning, Herning (9); Thomas Gohr, Fredericia Sygehus, Fredericia (9); Peter Clemmensen, RigsHospitalet, Koebenhavn (7); Jens Lomholdt, Slagelse Sygehus, Slagelse (3). **France:** Marine Verges, CHU Arnaud de Villeneuve, Montpellier (17); Benaissa Agraou, CH de Valenciennes, Valenciennes cedex (14); Gilles Montalescot, Hopital Pitie Salpetriere, Paris Cedex 13 (11); Vincent Probst, Hopital Nord Laennec, Nantes Cedex 1 (9); Michel Galinier, CHU Rangueil, Toulouse (7); Raymond Roudaut, Hopital Haut Leveque, Pessac (7); Anne Isabelle Tropeano, Hopital Henri Mondor, Créteil (4); Michel Ovize, Hop Cardiologique L Pradel, Bron cedex (4); Simon Elhadad, CH de Lagny Marne la Vallee, Jossigny (4); Abdelkader Belhassane, Hospital of Cambrai, Cambrai (3); Fabrice Dhoudain, Hopital Saint Joseph, Marseille (3); Francois Schiele, Public Hospital, Besancon (3); Nicolas Danchin, HEGP, Paris Cedex 15 (2); Teodora Dutoiu, Hopitaux de Chartres, Le Coudray (2); Christophe Caussin, Hopital Marie Lannelongue, Le Plessis Robinson (1); Yves Cottin, Hopital du Bocage, Dijon Cedex (1). **Germany:** Thomas Münzel, Johannes-Gutenberg University Klinikum, Mainz (33); Heinz Voeller, Klinik am See, Ruedersdorf (23); Franz Josef Neumann, Herz Zentrum Bad Krozingen, Bad Krozingen (20); Klaus Edel, Herz u Kreislaufzent Rotenburg, Rotenburg a.d. Fulda (19); Wolfram Kamke, MediClin Reha Zen Spreewald, Burg (19); Juergen vom Dahl, Kliniken Maria Hilf GmbH Kran, Moenchengladbach (15); Thomas Ali, Maria Heimsuchung Pankow, Berlin (15); Volker Schächinger, Klinikum Fulda gAG, Fulda (15); Mohammed Natour, Kardiologie Zentrum Neuenheim, Heidelberg (12); Christoph Kadel, Klinikum Frankfurt Hoechst, Frankfurt (11); Anja Löw, Med Klinik der LMU Munchen, München (9); Christian Hamm, Kerckhoff Klinik, Bad Nauheim (8); Hans-Dirk Düngen, Charite Campus Virchow Kliniku, Berlin (7); Siegfried Eckert, Heart and Diabetes Center Nort, Bad Oeynhausen (7); Ursula Hoffmann, Universitätsmedizin Mannheim, Mannheim (7); Eberhards von Hodenberg, MediClin Herzzentrum Lahr Baden, Lahr (6); Nikos Werner, Universitätsklinikum Bonn, Bonn (6); Ulrich Laufs, Universitaet des Saarlandes, Homburg (6); Hans-Friedrich Voehringer, DRK Kliniken Berlin Kopenick, Berlin (5); Holger Reinecke, Universitaetsklinikum Muenster, Muenster (5); Andreas Mügge, St Josef Hospital Bochum, Bochum (4); Eckart Fleck, Deutsches Herzzentrum Berlin, Berlin (4); Hannes Reuter, University of Cologne, Cologne (4); Johannes Hensen, Klinikum Region Hannover GmbH, Hannover (4); Martin Bergmann, Asklepios Klinik St Georg, Hamburg (4); Carsten Tschoepe, Charite Campus Benjamin Frankl, Berlin (3); Ursula Kuehne, Praxis Westend, Berlin (3); Nicolaos Proskynitopoulos, Kardio Gemein prax Nienburg, Nienburg (2); Peter Michalko, Klinikum Pirna GmbH, Pirna (2); Malte Kelm, University Hospital Dusseldorf, Duesseldorf (1). **Hungary:** Istvan Edes, Debreceni Egyetem OEC, Debrecen (71); Laszlo Koranyi, DRC Ltd, Balatonfured (44); Andras Papp, Szt Rokus Hospital, Budapest (30); Andras Vertes, Szent Istvan Hospital, Budapest (17); Ivan Horvath, PTE AOK, Pecs (16); Geza Lupkovics, Zala Megyei Korhaz, Zalaegerszeg (14); Laszlo Deak, Kaposi Mor Hospital, Kaposvar (12); Bela Benczur, Hetenyi Geza County Hospital, Szolnok (11); Erzsébet Sziliczei - Nemeth, Fejer Megyei Korhaz, Szekesfehervar (11); Gabriella Hodi, National Inst of Cardiology, Budapest (7); Kalman Csapo, B A Z County Hospital, Miskolc (5); Mihaly Dudas, Pandy Gyula Hospital, Gyula (5); Aniko Somogyi, Semmelweis Egyetem, Budapest (4); Istvan Czuriga, Outpatient Clinic of Debrecen, Debrecen (3); Lajos Nagy, Markusovszky Hospital Zrt, Szombathely (1). **India:** Keyur Parikh, CIMS Hospital Pvt Ltd,

Ahmedabad (132); Bipin Kumar Sethi, Care Hospital, Hyderabad (60); Rakesh Kumar Sahay, Medicity Hospital, Hyderabad (40); Rajendra Premchand, Krishna Institute of Med Sci, Hyderabad (28); Arpandev Bhattacharya, SHIVAJI, Bangalore (26); Jagdish Hiremath, Poona Hospital and Res Centre, Pune (26); Subir Ghosh, Sheth Shri Pukhraj Raichand Ho, Ahmedabad (22); Anil Jawahirani, Radiance Hospital, Nagpur (21); Kamal Sharma, Sanjivani Super Speciality Hospital, Ahmedabad (17); Milind Gadkari, KEM Hospital, Pune (17); Ashok Dash, City Diagnostics, Hyderabad (16); Sameer Dani, Life Care Inst Med Sci Res, Ahmedabad (16); Sudeep Kumar, Sanjay Gandhi Post Grad IMedSci, Lucknow (15); Purshottam Khanna, Sir Ganga Ram Hospital, New Delhi (14); Neeta Deshpande, Belgaum Diabetes Centre, Belgaum (12); Harish Kumar, Amrita Institute of Med Sciences, Kochi (11); Jaspal Arneja, Arneja Heart Institute, Nagpur (11); Selvamani Setthuraman, Meenakshi Mission Hospital and Research Center, Madhurai (11); Subhankar Chowdhury, Inst of Post Grad Med Ed Res, Kolkata (10); Yusuf Kumble, Unity Hospital Medicity Heart Care, Mangalore (10); Mallikarjun Jali, KLES Dr Prabhakar KORE Hospital, Belgaum (9); Shiva Yerra, Mahavir Hospital and Res Center, Hyderabad (9); Pramod Gandhi, Gandhi s Research Institute, Nagpur (8); Sanjay Mehrotra, Narayana Hrudayalaya Hospitals, Bangalore (7); Ganapathi Bantwal, St Johns Medical College, Bangalore (6); Hathur Basavanagowdappa, JSS Hospital, Mysore (6); Johnny Kannampilly, Lakeshore Hospital and Res Center, Kochi (6); Radhakrishnan Pathanakayil, Palakkad Diabetic Centre, Palakkad (6); Govind Malpani, Suyash Hospital Pvt Ltd, Indore (5); Guru Prasad, Global Hospital Health City, Chennai (5); Mukesh Sarna, Monilek Hospital And Research, Jaipur (5); Dheeraj Kapoor, Artemis Health Institute, Gurgaon (4); Prabha Adhikari, KMC Hospital, Mangalore (3); Suhas Hardas, Ruby Hall Clinic, Pune (3); Rameshbabu Byrapaneni, Medwin Hospital, Hyderabad (2); Tilak Suvarna, Asian Heart Institute, Mumbai (2). **Ireland:** John Barton, Portiuncula Hospital, Co Galway (12); Brendan McAdam, Beaumont Hospital, Dublin (8); Brian D MacNeill, Universtiy College Hospital Galway, Galway (8); Vincent M.G. Maher, AMNCH, Dublin (8); Declan Sugrue, Mater Misericordiae Universtiy Hospital, Dublin (4); Peter Antony Crean, St James Hospital, Dublin (3). **Italy:** Vincenzo Grassia, Ospedale S Maria delle Grazie, Pozzuoli (22); Giorgio Morocutti Azienda Ospedaliera Udine, Udine (21); Giovanni Tortorella, Azienda S Maria Nuova, Reggio Emilia (19); Francesco Cosentino, Universita La Sapienza, Roma (16); Ezio Bramucci, Policlinico S Matteo, Pavia (15); Pasquale Perrone Filardi, Universtiyersita Federico II, Napoli (13); Antonio Mafriaci, Ospedale Niguarda, Milano (12); Alessandro Salvioni, Centro Cardiologico Monzino, Milano (10); Lucia Ansani, Arcispedale S Anna, Cona Ferrara (9); Leonardo Pancaldi, Ospedale di Bentivoglio, Bentivoglio, Bologna (6); Stefano De Servi, Ospedale Civile di Legnano, Legnano, Milano (5); Claudio Cavallini, Azienda Ospedaliera Perugia, Perugia (3); Roberto Zanini, Ospedale Carlo Poma, Mantova (3); Giuseppe Musumeci, Ospedali Riuniti di Bergamo, Bergamo (2); Loris Roncon, Azienda Ospedaliera Rovigo, Rovigo (1). **Korea:** Keon Woong Moon, St Vincent s Hospital, Suwon (22); Eun Seok Shin, Ulsan University Hospital, Ulsan (16); Hee-Yeol Kim, Bucheon St Mary s Hospital, Bucheon (15); Jin Ok Jeong, Chungnam Universtiy Hospital Daejeon (14); Tae Joon Cha, Kosin Universtiy Gospel Hospital, Busan (14); Dae-Kyeong Kim, Inje Universtiy Busan Paik Hospital, Busan (13); Hui Kyung Jeon, Uijeongbu St Mary s Hospital, Uijeongbu (12); Do Sun Lim, Korea Uni Anam Hospital Seoul (11); Jung Han Yoon, Wonju Christian Hospital, Wonju (11); Keum Soo Park, Inha University Hospital, Incheon (11); Woong Chol Kang, Gil Medical Center Gachon Uni, Incheon (11); Myung Ho Jeong, Chonnam National Universtiy Hospital, Gwang Ju (10); Nam Ho Lee, Kangnam Sacred Heart Hospital, Seoul (10); Sang Hyun Kim, Boramae Medical Center, Seoul (9); Woo Jung Park, Hallym University Sacred Heart, Anyang (8); Seung Ho Hur, Daegu (6); Chang Gyu Park, Korea Uni Guro Hospital Seoul (5); Hyo Soo Kim, Seoul National Universtiy Hospital, Seoul (5); Jong-Seon Park, Yeungnam University Hospital, Daegu (5); Seung-Jea Tahk, Ajou University Hospital, Suwon (5); Sung Yun Lee, Inje Universtiy Ilsan Paik Hospital, Goyang (5); Jei Keon Chae, Chonbuk National Universtiy Hospital, Jeonju (3); Sang Wook Kim, Chung Ang Universtiy Hospital, Seoul (3); Soo Joong Kim, Kyung Hee Universtiy Medical Center, Seoul (3); Dong Woon Jeon, Ilsan Hospital, Goyangsi (2); Min Su Hyon, Soonchunhyang Uni Hospital, Seoul (2); Taek Jong Hong, Pusan National Universtiy Hospital Busan (1). **Malaysia:** Tiong Kiam Ong, Hospital Umum Sarawak, Kuching (27); Wan Azman Wan Ahmad, University Malaya Med Center, Kuala Lumpur (26); Omar Ismail, Hospital Pulau

Pinang, Georgetown (20); Kok Huan Ng, Hospital Tengku Ampuan Afzan, Kuantan (16); Mafauzy Mohamed, Hospital Universtiy Sains Malaysia, Kubang Kerian (13); Mansor Yahya, Hospital Raja Perempuan Zainab II, Kota Bharu (10); Rosli Mohd Ali, Institut Jantung Negara, Kuala Lumpur (5); Abd Kahar Abd Ghapar, Hospital Serdang, Kajang (2). **Mexico:** Jose Cervantes, Hospital Angeles Pedregal, Mexico City, (48); Marco Alcocer Gambe, Inst De Corazon De Queretaro, Quetaro (36); Armando Garcia Castillo, Cardiolink Clin Trials, Monterrey (25); Ciro Riojas, Riojas Global Trial Research Center, Monterrey (19); Mario Benavides, Hospital Universitario UANL, Monterrey (18); Guillermo Llamas, Hospital Card Aguascalientes, Aguascalientes (17); Jose Leiva Pons, Hospital Central Dr Morones Preito, San Luis Potosi (16); Enrique Lopex Rosas, Centro Esp Med Edo De Veracruz, Xalapa (15); Gabriel Ramos, Private Medical Office, Guadalajara (15); Manual De Los Rios, Cen Para El Des De La Med Esp Culiacan (15); Rafael Violante, Centro De Estudios Inv Met Card, Tampico (12); Enrique Mendoza, Inc Endocrinologia, Mexico City (10); Luis Nevarez Ruiz, Cent de Inv Cientifica del Est, Chihuahua (10); Alejandro Lechuga, Clinical Trials Mexico, Pachuca De Soto (9); Juan Carlos Perez Alva, Inst Cardiovas De Puebla, Puebla (9); Rodolfo Cedeño, Hospital Central Universitario, Chihuahua (9); Jesus Hernandez, Cen De Invclinica Del Pacifico, Acapulco (8); Roberto Quiroga Cantu, Hospital Metropolitano, San Nicolas De Los Garza (8); Luis Enrique Zaval Fernandez, Clin Diagn Del Guadiana, Durango (7); Raul Velasco, Hospital Dr Angel Leano, Zapopan (7); Arturo Guerra Lopez, Centro Medico Excel, Tijuana (6); Ernesto Cardona, ICLE SC, Guadalajara (6); Jorge Chavez, Inst Diab. Y Riesgo CV S A, Puerto Vallarta JORGE (6); Melchor Alpizar, Cedopec, Delegacion Miguel Hidalgo (5); Rosario Arechavaleta, Unidad de Patologia Clinica, Guadalajara (5); Daniel Micher, Clinical Research Institute, Tlalnepantla (4); Edmundo Bayram, Fund Cardiovasc Aguascalientes, Aguascalientes (4); Roxana Reyes Sánchez, Cardioprevent, Durango (4); Carlos Hernandez Herrera, Centro P Desar De La Medicina, Monclova (3); Homero Guzman Guerrero, Hrae Veracruz, Veracruz (3); Jose Ramirez Isunza, Instituto Biomedico de Investi, Aguascalientes (3); Hector Sanchez, Clinica Omega, Delegación Cuauhtemoc (2); Leocadio Munoz, Unidad De Investig En Salud, CD, Juarez (2); Manuel Guerrero Garza, Althian Research Center, Monterrey (2); Emma Miranda Malpica, CIF-BIOTEC Medica Sur, Tlalpan (1). **The Netherlands:** Arnoud Van T Hof, Isala Klinieken, Zwolle (23); Jean Paul Herrman, OLVG, Amsterdam (18); JW Jukema, L U M C Cardiology, Leiden (13); Patrick Bronzwaer, Zaans MC, Zaandam (9); Wilhelm Ten Holt, Ziekenhuis Amstelland, Amstelveen (7); Jurrien ten Berg, St Antonius Ziekenhuis, Nieuwegein (6); Robbert De Winter, AMC, Amsterdam (6); Dick Basart, VOCH, Hoorn (4); Jaqueline de Graaf, UMC ST RABBOUD, Nijmegen (4); Victor Ea Gerdes, Slotervaart Hospital, Amsterdam (3); Marcel Bokern, Waterlandziekenhuis, Purmerend (1). **New Zealand:** Richard Troughton, Universtiy of Otago Christchurch, Christchurch (14); Nick Fisher, Nelson Hospital, Nelson (13); Selwyn Wong, Middlemore Hospital, Auckland (10); Eng Wei (David) Tang, Palmerston North Hospital, Manawatu (9); Kingsley Balaratnam Nirmalaraj, Tauranga Hospital, Tauranga (8); Tim O'Meeghan, Hutt Valley District Health Board, Wellington (6). **Poland:** Jacek Nowak, Gabinet Kardiologiczno Intern, Libiaz (84); Barbara Kusnierz, Wojew Szpital Specj Nr 4, Bytom (50); Piotr Pieniazek, Krakowski Szpital Specj, Krakow (41); Donald Drodz, NZOZ Zdowie sc, Wroclaw (29); Maciej Zarebinski, Specj Szpital Zachodni, Grodzisk Mazowiecki (29); Piotr Ponikowski, Wojskowy Szpital Kliniczny, Wroclaw (28); Maciej Kosmider, Prywatny Gabinet Kardiologiczn, Lodz (27); Wlodzimierz Musial, Uniwersytecki Szpital Klin, Bialystok (27); Maciej Zabowka, Specj Gabinet Lek E Zabowka, Tarnow (26); Maciej Hamankiewicz, Szpital w Bedzinie, Bedzin (21); Boguslaw Derlaga, Specj Gabinet Lekarski, Tarnow (20); Marek Piepiorka, Gabinet Kardiologiczno-Interni, Gdynia (18); Krzysztof Kuc, SPZOZ Szpital Wojewodzki, Zielona Gora (16); Marianna Janion, Prywatny Gabinet Lekarski, Kielce (16); Jerzy Kuzniar, Szpital Wojewodzki Numer 2, Rzeszow (15); Tomasz Wierzykowski, Szpital im A Troczewskiego, Kutno (15); Ryszard Serafin, NZOZ Serafin Med, Zarow (14); Janusz Kochman, SP Centralny Szpital Kliniczny, Warszawa (13); Zbigniew Pijanowski, Twoja Przychodnia, Lublin (12); Krystyna Jaworska, Wojewodzki Szpital Zespolony, Torun (11); Michal Szpajer, Poliklinika EVI MED Sp z o o, Gdynia (10); Pawel Miekus, Gabinet Kardiologiczny Medipul, Gdynia (10); Andrzej Cwetsch, Centr Szpital Kliniczny MON, Warszawa (8); Andrzej Ochala, Unimed, Katowice (8); Marek Konieczny, KO Med Gabinet Lekarski, Pulawy (8); Andrzej Hoffmann, Szpital Miejski SPZOZ, Bydgoszcz (7); Jerzy Kowalski, NZOZ Medyk

Sp z o o, Wola (7); Jolanta Walczewska, Szpital Uniwersytecki, Krakow (7); Maria Krzeminska-Pakula, Wojew Specjalistyczny Szpital, Lodz (7); Pawel Buszman, American Heart of Poland, Dabrowa Gornicza (7); Leszek Bryniarski, L Bryniarski Praktyka Lekarska, Krakow (6); Michal Ogorek, Prywatny Gabinet Lekarski, Piotrkow Trybunalski (6); Miroslaw Dluzniewski, Wojewodzki Szpital Brodnowski, Warszawa (4); Pawel Buszman, American Heart of Poland, Kedzierzyn-Kozle (4); Ryszard Sciborski, ZOZ w Olawie, Olawa (4); Jacek Miarka, ZOZ w Nysie Szpital w Nysie, Nysa (3); Jaroslaw Hiczkiwicz, Wielospecjalistyczny Szpital, Nowa Sol (3); Andrzej Kleinrok, SP Szpital Wojewodzki, Zamosc (2); Andrzej Wysokinski, SP Szpital Kliniczny nr 4, Lublin (2); Bartlomiej Janiak, Swidnicy Reg Szpital LATAWIEC, Swidnica (2); Kazimierz Szczuka, Szpital Specj H Klimontowicza, Gorlice (2); Maciej Lesiak, Szpit Klin Przem Panskiego, Poznan (2); Tomasz Dryja, WSS, Zgorzelec (2); Andrzej Rynkiewicz, Uniwers Centrum Kliniczne, Gdansk (1); Hanna Szwed, Instytut Kardiologii, Warszawa (1); Jacek Gorski, Centrum Med Morskiej i Trop, Gdynia (1); Maciej Olszewski, NZOZ AMAMED, Warszawa (1); Pawel Buszman, American Heart of Poland, Bielsko-Biala (1). **Romania:** Imre Sandor Benedek, Cardio Med SRL, Targu-Mures (23); Amarin-Remus Popa, Emergency Clinical County Hospital, Oradea (19); Constantin Militaru, CARDIOMED SRL, Craiova (11); Magdalena Morosanu, CMI Dr Morosanu Magdalena, Galati (6); Silvana Constantinescu, SC MEDCON SRL, Buzau (6); Simona Tivadar, O D Medica SRL, Bucharest (6); Alexandrina Popescu, Diabmed Dr Popescu Alexandrina, Ploiesti (5); Mariana Radoi, County Clin Emerg Hospital Brasov, Brasov (5); Ana-Gabriela Fruntelata, ILRO Medical SRL, Bucharest (4); Ioan Andrei Veresiu, County Clin Emerg Hospital Cluj, Cluj Napoca (4); Stefan Iosif Dragulescu, Timisoara Inst of Card Disease, Timisoara (1). **Russia:** Sergey Eryshev, Saint Petersburg St Inst Hlter, Saint-Petersburg (22); Elena Baranova, Pavlov SPb Medical University, Saint-Petersburg (8); Alexey Yakovlev, Almazov Fed Hrt Blood Endo Center, Saint-Petersburg (5); Ivan Gordeev, City Clinical Hospital 15, Moscow (4); Alexander Gorelov, Saint Petersburg Clin Hsp 122, Saint-Petersburg (2). **Spain:** Miguel Gonzalez-Valdayo Lopez, H Virgen De La Macarena, Sevilla (78); Xavier Pinto, H Universtiy de Bellvitge, Hospitalet del Llobregat (46); Jose Blanco Coronado, Hospital Virgen del Mar, Almeria (38); Carlos Pérez Muñoz, H De Jerez De La Frontera, Jerez de la Frontera (37); Jose Garcia Acuna, C H U De Santiago, Santiago de Compostela (26); Francisco Ridocci Soriano, H G U de Valencia, Valencia (21); Manuel Jimenez Navarro, H Virgen De La Victoria, Malaga (21); Rafael Rubio Sanz, Hospital Gregorio Maranon Madrid (21); Enrique Galve Basilio, Hospital Vall d Hebron, Barcelona (19); Jorge Bruguera Cortada, Hospital del Mar, Barcelona (19); Jose Antonio Ruiz Ros, Hospital Morales Meseguer, Murcia (18); Carlos Miguel Macaya, Hospital Clinico San Carlos, Madrid (17); Carlos Gonzalez Juanatey, C H Xeral Calde, Lugo (12); Alejandro Jordan Torrent, Hospital General de Alicante, Alicante (10); Javier Balaguer Recena, Hospital De Guadalajara, Guadalajara (10); Javier Botas, H U Fundacion Alcorcon, Alcorcon (10); Pablo Avanzas Fernandez, Hospital Central De Asturias, Oviedo (10); Josep Alegret, St Joan de Reus, Reus (8); Xavier Garcia Moll, H Santa Creu i Sant Pau, Barcelona (7); Esther Sanz, Hospital Universtiy de Tarragona Joan, Tarragona (5); Julio César Blázquez, Hospital de Torre Vieja, Torre Vieja (5); Josep Guindo Soldevila, Corporacio Sanitaria ParcTauli, Sabadell (4); Nekane Murga, Hospital de Basurto, Bilbao (3); Diego Bellido, Hospital Arquitecto Marcide, Ferrol (2); Ignacio Plaza, Hospital Infanta Sofia, San Sebastian de los Reyes (2). **Sweden:** Linda Mellbin, Karolinska University Hospital, Stockholm (21); Gunnar Boberg, Sodertjukhuset, Stockholm (17); Thomas Mooe, Ostersunds sjukhus, Ostersund (15); Patrik Tyden, Skanes Universitetssjukhus, Malmo (13); Rickard Linder, Danderyd Sjukhus, Stockholm (11); Riitta Luostarinen, Centralsjukhuset i Karlstad, Karlstad (11); Mete Axelkvist, Kalmar Lanssjukhus, Kalmar (10); Thomas Pettersson, Centralsjukhuset Kristianstad, Kristianstad (10); Kurt Boman, Skelleftea Lasarett, Skelleftea (8); Hakan Jidbratt, Karnsjukhuset KSS Skovde, Skovde (7); Mats Lindgren, Hallands sjukhus Halmstad, Halmstad (5); Per Johanson, Sahlgrenska Uni Hospital, Goteborg (4). **Thailand:** Chaiyasith Wongvipaporn, Srinagarind Hospital KCU, Khon Kean (50); Srun Kuanprasert, Chiang Mai U Hospital CMU, Chiang Mai (24); Suphot Srimahachota, Chulalongkorn Hospital Chula, Bangkok (24); Khanchai Siri Wattana, Nakornping Hospital, Amphur Mae-Rim (18); Pornchai Ngamjanyaporn, Chonburi Hospital, Chonburi (16); Damras Tresukosol, Siriraj Hospital Siriraj, Bangkok (15); Pitha Promlikitchai, Saraburi Hospital, Saraburi (15); Paiboon Chotnoparatpat, Vajira Hospital

Vajira, Bangkok (12); Prawit Taweangsaksakul, Khonkaen Hospital, Khon Kaen (10); Tomon Thongsri, Buddhachinaraj Phitsanuloke, Amphur Muang (10); Wattana Wongthepian, Chiangrai Prachanukros Hospital, Amphur Muang (10); Nakarin Sansanayudh, Phramongkutklo Hospital PMK, Bangkok (8); Pisit Hutayanon, Thammasat U Hospital TU, Patumthani (8); Thanakorn Laksomya, Naresaun U Hospital NU, Phitsanulok (6); Piyamitr Sritara, Ramathibodi Hospital Rama, Bangkok (5).

**United Kingdom:** Dallas Price, Vectasearch Clinic, Newport (24); Rajesh Aggarwal, Basildon University Hospital, Basildon (14); Ian Purcell, Freeman Hospital, Newcastle upon Tyne (13); Ceri Davies, The London Chest Hospital, Bethnal Green (9); Iqbal Malik, St Mary's Hospital ICL, Paddington (9); Andonis Violaris, Northwick Park Hospital, Harrow (7); Frances Game, Royal Derby Hospital, Derby (7); John Harvey, Maelor Hospital, Wrexham (6); Douglas Robertson, Sandwell Medical Research Unit, West Bromwich (5); Honer Kadr, Queen s Hospital, Romford (5); Thomas Graham Trouton, Northmed Clinical Research Ltd, Randalstown (5); Raffi Kaprielian, W Middlesex Universtiy Hospital, Isleworth (4); David Dutka, Addenbrooke s Hospital, Cambridge (3); David Hildick-Smith, Brighton Sussex Universtiy Hospitals, Brighton (3); Robert Butler, Universtiy Hospital of N Staffordshire, Stoke on Trent (3); Sandra MacRury, Inverness Highland CRF, Inverness (3); Beverley Ann Millward, Diabetes Research Unit, Plymouth (2); John Purvis, Altnagelvin Area Hospital, Londonderry (2); John Reckless, Royal United Hospital Bath, Bath (2); Ramzi Ajjan, University of Leeds, Leeds (2); Diane Bruce, Poole Hospital, Poole (1); Dominic Cox, Northampton General Hospital, Northampton (1); Iqbal Malik, Ayr Hospital, Ayr (1); Jaspal Kooner, Ealing Hospital, Southall (1); Scott Muir, Glasgow Western Infirmary, Glasgow (1); Simon Hutchinson, Ballygomartin Group Practice, Belfast (1).

**United States:** Dinesh Gupta, Tennessee Center For Clin Trials, Tullahoma (65); Debra Weinstein, Zasa Clinical Research, Boynton Beach (41); Mark Bieniarz, New Mexico Heart Institute, Albuquerque (31); Mahmoud Traina, Olive View UCLA Medical Center, Sylmar (26); Ira Lieber, Texas Cardiology Research Cntr, Kingwood (23); John Mohart, Patients First Health Care, Washington (23); John Prodafikas, Cardiovascular Consultants, Canton (18); Donald Laurion, Nanticoke Cardiology P A, Seaford (17); Mandeep Oberoi, Central Jersey Health Care, Elizabeth (17); Eric Carlson, Eastern Cardiology PA, Greenville (15); John Schmedtje, Roanoke Heart Institute PLC, Roanoke (15); Ronald Mayfield, Mountain View Clinical Rsearch, Greer (15); Gina Chandler, The Heart and Vascular Clinic, Nashville (14); Kalgi Modi, LSU Health Sciences Center, Shreveport (14); Matthew Budoff, LA Biomedical Research Ins, Torrance (14); Richard Zelman, Cape Cod Research Institute, Hyannis (14); Robert Dalton, Orlando Heart Center, Orlando (14); Kwan Lee, University of Arizona, Tucson (13); Paul Gordon, The Miriam Hospital, Providence (13); Woubeshet Ayenew, HCMC Cardiology Research, Minneapolis (13); Charles Mathis, Midwest CV Research Ed, Elkhart (12); Robert Busch, The Endocrine Group LLP, Albany (12); Timothy Schuchard, Central MN Heart Center, St. Cloud (12); Ajit Raisinghani, U of CA San Diego Research, San Diego (10); Alexander M Shepherd, U TX Health Sciences, San Antonio (10); Naseem Jaffrani, Alexandria Cardiology Clinic, Alexandria (10); Peter Ver Lee, NE Cardiology Associates, Bangor (10); Yellapragada Chandrashekhar, VA Medical Center, Minneapolis (10); Akber Mohammed, Apex Medical Research Inc, Springfield (9); Giora Weisz, Columbia University Medical Center, New York (9); Hossein Almassi, Zablocki VAMC Milwaukee, Milwaukee (9); Joseph Krantzler, Pottstown Medical Specialists Inc., Pottstown (9); Mark Quadrel, Internal Medicine of Morris Co, Mine Hill (9); Scott Martin, Covenant Medical Center, Saginaw (9); Sorin Brener, New York Methodist Hospital, Brooklyn (9); Barry Harris, Sunrise Clinical Research Inc, Hollywood (8); Charles Eaton, Memorial Hospital of RI, Pawtucket (8); Chippy Nalluri, Sarasota Memorial Hospital, Sarasota (8); Gregory Schwartz, VA Medical Center, Denver (8); Harinder Gogia, Cardiology Consultants of Orange County Medical Group Inc, Anaheim (8); Harry Colfer, Northern Michigan Regional Hospital, Petoskey (8); John Doherty, Jefferson Heart Institute, Philadelphia (8); Nguyen Dang, Chest and Critical Care Conslts, Anaheim (8); Ronald Blonder, Pikes Peak Cardiology, Colorado Springs (8); Stuart Jacobson, Research Concepts Ltd, Houston (8); William Rogers Jr, University of Alabama Med Center, Birmingham (8); Ellis Levin, VA Long Beach Healthcare System, Long Beach (7); George Isa, Dorothy H Banish MD APMC, Covington (7); Harish Chandna, Victoria Heart Vascular, Victoria (7); Jang Singh, Vernon Medical Center, Worcester (7); Les Forgosh, HealthEast St Joseph's Hospital, St. Paul (7); Michael Melucci, South Texas Cardiovascular,



Kerrville (7); Robert Chilton, S TX VA Health Center ALMVAH, San Antonio (7); Salah El Hafi, MedTech LP, Houston (7); Brian Way, SOFHA Clinical Research, Johnson City (6); Charles Lambert, Pepin Heart University Comm Hospital Tampa (6); Elie Korban, Kore CV Research, Jackson (6); Eric Auerbach, Oklahoma Heart, Tulsa (6); Keith Hickey, Louisiana Heart Center, LaPlace (6); Marcus McKenzie, Legacy Heart Center, Plano (6); Neeraj Tandon, Overton Brooks, Shreveport (6); Sharan Mahal, Advanced Heart Care LLC, Bridgewater (6); Stephen Heitner, Oregon Health Science University, Portland (6); David O'Halloran, Beth Israel Deaconess Med Center, Boston (5); Irving Kent Loh, Westlake Medical Research, Thousand Oaks (5); Jeffrey Harris, McLaren Regional Med Center, Flint (5); Joseph Gelormini, Buffalo Heart Group LLP, Buffalo (5); Leonardo Clavijo, University of Southern California, Los Angeles (5); Marc Klapholz, UMDNJ University of Medicine, Newark (5); Mark Studeny, University Cardiovascular Services, Huntington (5); Rajiv Goswami, Ben Taub General Hospital, Houston (5); Robert Norris, Pennsylvania Cardiology Assoc, Philadelphia (5); Rodica Pop Busui, University of Michigan HS Ann Arbor, Ann Arbor (5); Sammy Lane Cox, Pharma Tex Research, Amarillo (5); Tahir Tak, Franciscan Skemp Healthcare, LaCrosse (5); Thomas Anan, Providence Park Hospital, Novi (5); Touraj Taghizadeh, Southwest General Health Center, Middleburg Heights (5); Vincent Pompili, The Ohio State University, Columbus (5); Alan Camp, The Heart and Vascular Institute, Clearwater (4); Amit Khera, University of Texas SW Med Center, Dallas (4); Anil Shah, Coastal Multi Specialty Research, Santa Ana (4); Anthony Frey, Atlantic Cardiology Assoc PA, Salisbury (4); Bosh Zakhary, Virginia Research Institute, Danville (4); Daniel Humiston, Utah Cardiology PC, Layton (4); David Griffin, G G Research, Vero Beach (4); David Herrington, Wake Forest University School of Medicine, Winston-Salem (4); David Perloff, Broward General Medical Center, Ft. Lauderdale (4); Dean Kereiakes, The Lindner Center, Cincinnati (4); Elena Christofides, Endocrinology Associates Inc, Columbus (4); Eric Dippel, Midwest CV Research Foundation, Davenport (4); Gordon Fung, UCSF Medical Center, San Francisco (4); Henri Marais, CARE Clinical Research, Banning (4); Imran Dotani, McFarland Clinic PC, Ames (4); James Fidelholtz, Hightop Medical Research, Cincinnati (4); James Hermiller, St Vincent Medical Group, Indianapolis (4); Jayaram Naidu, Naidu Clinic, Odessa (4); John Gilbert, St Jude Heritage ClinTrials, Fullerton (4); Mohamed El-Shahawy, Academic Med Research Inst Inc, Los Angeles (4); Mustafa Mandviwala, Northwest Heart Center, Tomball (4); Padmashri Rastogi, Dallas VA Medical Center, Dallas (4); Patrick Breaux, Ochsner Clinic Foundation, New Orleans (4); Paul Norwood, Valley Research, Fresno (4); Paul Staab, American Clinical Research LLC, Marrero (4); Richard Fish, SW Cardiovascular Consultants, Houston (4); Robert Sanchez, The Heart and Vascular Institute Florida, St.Petersburg (4); Vishal Gupta, Borgess Medical Center Research Inst, Kalamazoo (4); William Herzog, CV Specialists of Central MD, Columbia (4); Abram Rabinowitz, South Texas CV Consultants, San Antonio (3); Aditya Samal, Northwest Houston Cardiology, Houston (3); Ameer Kabour, Mercy St. Vincent Medical Center, Toledo (3); Daniel Lee, Bay Regional Medical Center, Bay City (3); Edward Carlos, Sunbelt Research Group LLC, Mobile (3); Edward Kosinski, Connecticut Clinical Research LLC, Bridgeport (3); Edward Portnay, Cardio Associate of Fairfield, Stamford (3); Ernesto Rivera, Amarillo Heart Clinical Research, Amarillo (3); Ivy Joan Madu, Diabetes Associates Med Group, Orange (3); James Welker, Anne Arundel Medical Center, Annapolis (3); Jonathan Fialkow, Cardiovasc Research Center of South FL, Miami (3); Juan Londono, Future Care Solution LLC, Miami (3); Luis Martinez, University Clin Research Assoc, Doral (3); Mark Pirwitz, Seton Heart Institute, Austin (3); Mehrdad Ariani, Mehrdad Ariani M D Inc, Northridge (3); Mohammad Saklayen, VA Medical Center Dayton OH, Dayton (3); Nampalli Vijay, Aurora Denver Cardiology Assoc, Denver (3); Robert Feldman, MediQuest Research Group Inc. at Munroe Regional Medical Center, Ocala (3); Robert Rosenson, Mount Sinai Medical Center, New York (3); Steven Steinhubl, Geisinger Clinic, Danville (3); Venkatraman Srinivasan, Allegheny Valley Hospital, Natrona heights (3); Vinod Nair, Cardio Inst of South, Houma (3); Yoseph Shalev, Aurora Health Care, Milwaukee (3); Alain Bouchard, Cardiology PC, Birmingham (2); Allen Adolphe, Clinical Translational, Albuquerque (2); Andrew Miller, Cardiovascular Associates PC, Birmingham (2); Anwar Ahmad, East Texas Cardiology PA, Houston (2); Bassam Omar, University of South Alabama, Mobile (2); Bassem Masri, Weill Cornell Medical College, New York (2); Bruce Iteld, Louisiana Heart Center Research, Sidell (2); Cameron Gifford, Durham Internal Medicine

Assoc, Durham (2); Cranford Scott, Chrishard Medical Group, Inglewood (2); Francisco Maislos, Memorial Hermann, Houston (2); James Longo, Cardiology PC, Syracuse (2); James Rider, Cardiology Association of Bellin Health, Green Bay (2); Jay Silverstein, Louisiana Heart Center, Hammond (2); Michael Miller, University of Maryland, Baltimore (2); Michele Nanna, Cardiac Care and Vascular Med, Bronx (2); Misal Khan, Misal Khan M D FRCS Ed P A, Panama City (2); Ricky Schneider, Holy Cross Medical Group, Coral Springs (2); Riyaz Bashir, Temple University Hospital, Philadelphia (2); Robert Evans, Endocrine Research Associates, Jackson (2); Robert Fierer, Kandra Fierer Kuskin Assoc. Ltd, Harrisburg (2); Samuel Teniola, PMI Health Research Group, Atlanta (2); Stephen Welka, Aurora Burlington Clinic, Burlington (2); Vibhuti Singh, Suncoast Cardiovasc Research, St. Petersburg (2); William Randall, PriMed Clinical Research, Dayton (2); William Rowe, Great Falls Clinic LLP, Great Falls (2); Abraham Salacata, Endeavor Medical Research, Alpena (1); Ali Bazzi, Miami Intl Cardio Consultants, Aventura (1); Alon Steinberg, Ventura Clinical Trials, Ventura (1); Aryan Mooss, Cardiac Center Of Creighton University, Omaha (1); Aylmer Tang, Chambersburg Hospital, Chambersburg (1); Brian Kahn, Overlea Personal Physicians, Baltimore (1); Bronell Chandler, Chandler Thakur Medical Group, Upper Darby (1); Carlos Bayron, Interventional Cardiac Cons, Trinity (1); Carsten Schmalfuss, VAMC Gainesville, Gainesville (1); Cary Hirsch, Metropol Cardio Consultants, Suffern (1); Charles Thompson, Southern Clinical Research, Zachary (1); Craig Thompson, Frederick C Smith Clinic Inc, Marion (1); Dinesh Singal, Heart Vascular Center New Brunswick, Somerset (1); Eric Lo, Edgewater Medical Research Inc, New Smyrna Beach (1); Eric Spivack, CardioCare of South Florida PA, Aventura (1); Geetha Gopalakrishnan, The Hallett Center, East Providence (1); James Lowe, Duke University Medical Center, Durham (1); James Talano, Swicft Institute, Naples (2); Jeanine Albu, University Med Practice Assoc, New York (1); John McClure, Mid-Michigan Heart and Vasc, Saginaw (1); John McGettigan, Quality Life Med Res Center, Tucson (1); Jonathan Hemphill, Capitol Interventional Card, Carmichael (1); Kishor Vora, Research Integrity LLC, Owensboro (1); Maria Del Pilar Solano, University of Miami, Miami (1); Mohammad Shoukfeh, Texas Cardiac Center, Lubbock (1); Patricia Best, Mayo Clinic, Rochester (1); Paul Thompson, Hartford Hospital, Hartford (1); Salvador Borromeo, III, Medical Research Inc of Las Vegas, Las Vegas (1); Thomas Barringer, Presbyterian Novant Heart, Charlotte (1); Thomas Hilton, Jacksonville Heart Center, Jacksonville (1); Thomas Knickelbine, Minneapolis Heart Institute, Minneapolis (1); William Palmer, Westroads Medical Group, Omaha (1).

## eAppendix 2: Eligibility Criteria

### Inclusion Criteria

- Age > 18 years
- Established or newly-diagnosed T2DM
- Ability to give informed consent
- Hospitalization for an ACS event within the prior 8 weeks

### ACS Criteria

- | <b>Myocardial Infarction</b>                                                                                                                                                                                                                                                                                                                                                                          | OR | <b>Biomarker-Negative ACS<br/>(Unstable Angina)</b>                                                                                                                                                                                                                                                                                                                   |
|-------------------------------------------------------------------------------------------------------------------------------------------------------------------------------------------------------------------------------------------------------------------------------------------------------------------------------------------------------------------------------------------------------|----|-----------------------------------------------------------------------------------------------------------------------------------------------------------------------------------------------------------------------------------------------------------------------------------------------------------------------------------------------------------------------|
| <ul style="list-style-type: none"><li>• Cardiac biomarkers (troponin I or T, CK-MB mass, or CK-MB activity) with at least one determination &gt; 99th percentile or above the local laboratory upper reference limit.</li></ul>                                                                                                                                                                       |    | <ul style="list-style-type: none"><li>• No elevation of cardiac biomarkers</li><li>• Chest pain or ischemic symptoms at rest &gt;10 minutes</li><li>• Prompting Hospitalization or chest pain observation unit within 24 hours of symptoms</li></ul>                                                                                                                  |
| AND one of the following:                                                                                                                                                                                                                                                                                                                                                                             |    | AND one of the following:                                                                                                                                                                                                                                                                                                                                             |
| <ul style="list-style-type: none"><li>• Chest pain or ischemic symptoms at rest &gt;10 minutes within prior 24 hours</li><li>• New ECG changes of acute ischemia (LBBB, ST elevations, or ST depressions)</li><li>• New pathologic Q-waves or R/S &gt;1 in V1-V2</li><li>• Regional myocardial scar or ischemia by nuclear, magnetic resonance, echocardiographic, or angiographic imaging.</li></ul> |    | <ul style="list-style-type: none"><li>• New or worsening ECG changes (transient ST elevation, ST depression, or T inversion)</li><li>• Definite myocardial ischemia on nuclear or echocardiographic imaging</li><li>• Angiographic stenosis &gt;70% or thrombus in epicardial coronary artery or bypass graft</li><li>• Need for coronary revascularization</li></ul> |

ACS – acute coronary syndrome; CK-MB – creatinine kinase – MB fraction; T2DM – type 2 diabetes mellitus

**Exclusion Criteria**

|              |                                                                                                                                                                                                                                                                                                                                                                                                                                                                                                                                                                                                                                                                |
|--------------|----------------------------------------------------------------------------------------------------------------------------------------------------------------------------------------------------------------------------------------------------------------------------------------------------------------------------------------------------------------------------------------------------------------------------------------------------------------------------------------------------------------------------------------------------------------------------------------------------------------------------------------------------------------|
| Drug-related | <ul style="list-style-type: none"><li>• Concomitant treatment with TZD or fibrate</li><li>• Prior intolerance to TZD or fibrate</li><li>• Triglycerides (fasting) &gt; 400 mg/dL</li><li>• Systemic corticosteroid therapy for &gt; 2 weeks within 3 months before screening</li></ul>                                                                                                                                                                                                                                                                                                                                                                         |
| Medical      | <ul style="list-style-type: none"><li>• Clinically apparent liver disease (jaundice, active hepatitis, ALT &gt; 3 x ULN)</li><li>• Anemia (hemoglobin &lt; 10 mg/dL or hematocrit &lt;30%)</li><li>• eGFR<sub>MDRD</sub> &lt; 45 ml/min/1.73m<sup>2</sup></li><li>• Symptomatic congestive heart failure classified as NYHA class II-IV</li><li>• Hospitalization with primary diagnosis of heart failure in the 12 months prior to randomization</li><li>• Peripheral edema felt to be severe in the judgment of the enrolling investigator</li><li>• Serious comorbid condition in which life expectancy is shorter than the duration of the study</li></ul> |
| General      | <ul style="list-style-type: none"><li>• Serious medical condition which could interfere with the conduct of the study</li><li>• Unwillingness or inability to comply with study procedures (including drug or alcohol abuse)</li><li>• Positive pregnancy test, breast-feeding women, or women of childbearing potential not using highly effective methods of contraception</li><li>• Participation in a clinical trial with an investigative device or drug within one month prior to screening.</li></ul>                                                                                                                                                   |

ALT – alanine transaminase; eGFR<sub>MDRD</sub> – estimated glomerular filtration rate by Modification of Diet in Renal

Disease formula; NYHA – New York Heart Association; TZD – thiazolindinedione; ULN – upper limit of normal.

## Endpoint Definitions

The primary efficacy endpoint is the time to first occurrence of any component of the composite of cardiovascular death, non-fatal MI, or non-fatal stroke.

### DEATH

#### Cardiovascular Death

Cardiovascular death includes sudden death, death due to acute myocardial infarction, death due to heart failure, death due to cerebrovascular accident (stroke) and death due to other cardiovascular causes, as follows:

1. **Sudden Cardiac Death:** refers to death that occurs unexpectedly in previously stable patient and should include the following deaths:
  - Witnessed and instantaneous without new or worsening symptoms and also in absence of progressive, prolonged ( $\geq 60$  minutes) circulatory failure
  - Witnessed within 60 minutes of the onset of new or worsening symptoms unless a cause other than cardiac is obvious
  - Witnessed and attributed to an identified arrhythmia (e.g., captured on an ECG recording or witnessed on a monitor by either a medic or paramedic)
  - Patient resuscitated from cardiac arrest in the absence of pre-existing circulatory failure or other causes of death, including myocardial infarction, and who died within 24 hours or without gaining consciousness; similar patients who died during an attempted resuscitation
  - Unwitnessed death in the absence of pre-existing progressive circulatory failure or other causes of death (information regarding the patient's clinical status within the week preceding death should be provided).
2. **Death due to Myocardial Infarction:** death occurring up to 14 days after a documented MI verified either by diagnostic criteria outlined for MI or by autopsy findings showing recent MI or recent coronary thrombus and where there is no conclusive evidence of another causes of death. If death occurs before biochemical confirmation of myocardial necrosis can be obtained, adjudication should be based on clinical presentation and ECG evidence. Death due to myocardial infarction that occurs as direct consequence of a cardiovascular investigation/procedure/operation will be classified as death due to other cardiovascular cause.
3. **Death due to Heart Failure:** refers to death occurring in the context of clinically worsening symptoms and/or signs of heart failure without evidence of another causes of death and includes any of the following:
  - New or increasing symptoms and/or signs of heart failure requiring the initiation of, or an increase in, treatment directed at heart failure or occurring in a patient already receiving maximal therapy for heart failure
  - Heart failure symptoms or signs requiring continuous intravenous therapy or oxygen administration
  - Confinement to bed but only if this is due entirely to heart failure symptoms
  - Pulmonary edema sufficient to cause tachypnea and distress not occurring in the context of an acute myocardial infarction or as a consequence of an arrhythmia occurring in the absence of worsening heart failure
  - Cardiogenic shock not occurring in the context of an acute myocardial infarction or as the consequence of an arrhythmia occurring in the absence of worsening heart failure.

Cardiogenic shock is defined as systolic blood pressure (SBP)  $< 90$  mm Hg for greater than 1 hour, not responsive to fluid resuscitation and/or heart rate correction, and felt to be secondary to cardiac dysfunction and associated with at least one of the following signs of hypoperfusion:

- Cool, clammy skin or
- Oliguria (urine output  $< 30$  mL/hour) or

- Altered sensorium or
- Cardiac index  $< 2.2$  L/min/m<sup>2</sup>

Cardiogenic shock can also be defined as SBP  $\geq 90$  mm Hg as a result of positive inotropic or vasopressor agents alone and/or with mechanical support in less than 1 hour.

This category will include sudden death during an admission for worsening heart failure.

4. **Death due to Cerebrovascular Accident** (intracranial hemorrhage or non-hemorrhagic stroke): refers to death occurring up to 30 days after documented stroke (verified by CT/MRI imaging or by autopsy findings showing recent stroke) and where there is no conclusive evidence of another cause of death.
5. **Death due to Other Cardiovascular Causes:** death must be due to fully documented cardiovascular cause not included into above categories (e.g. dysrhythmia, pulmonary embolism or other cardiovascular intervention).

### **Non-cardiovascular Death**

Death occurs and is due primarily to an identifiable non-cardiovascular cause or etiology. Specific diagnoses may include respiratory failure, pneumonia, trauma, suicide, or any other non-cardiovascular defined causes (e.g., liver disease, etc.) not included in the previous categories. Only death due to a documented non-cardiovascular cause will be classified as noncardiovascular.

### **Presumed Cardiovascular Death**

All deaths not attributed to the above categories of cardiovascular death and not attributed to a non-cardiovascular cause, will be presumed cardiovascular deaths and as such be part of the CV mortality endpoint.

## MYOCARDIAL INFARCTION

### Spontaneous Myocardial Infarction

A diagnosis of a qualifying MI event in a clinical setting consistent with myocardial ischemia will be defined by abnormal levels of cardiac biomarkers (troponin I or T or CK-MB mass) with at least one determination > the 99th percentile or above the upper reference limit as specified by the local laboratory. Preferably the diagnosis should be based on two measurements of troponin I or T showing a rise and/or fall in pattern.

And at least one of the following:

- Chest discomfort or symptoms of myocardial ischemia ( $\geq 10$  minutes) at rest within 24 hours prior to Hospitalization for MI
- ECG changes indicative of acute myocardial ischemia [in absence of left ventricular hypertrophy (LVH) and left bundle branch block (LBBB)] as listed below or new left bundle branch block:
- New ST elevation at the J-point in two contiguous leads with the cut-off points:  $\geq 0.2$  mV in men or  $\geq 0.15$  mV in women in leads V2–V3 and/or  $\geq 0.1$  mV in other leads
- New horizontal or down-sloping ST depression  $\geq 0.05$  mV in two contiguous leads; and/or T inversion  $\geq 0.1$  mV in two contiguous leads with prominent R-wave or R/S ratio  $> 1$
- Development of pathological Q-waves or R-waves on the ECG as described below:
  - Any Q-wave in leads V2–V3  $\geq 0.02$  s or QS complex in leads V2 and V3  
Q-wave  $\geq 0.03$  s and  $\geq 0.1$  mV deep or QS complex in leads I, II, aVL, aVF, or V4–V6 in any two leads of a contiguous lead grouping (I, aVL, V6; V4–V6; II, III, and aVF) (The same criteria are used for supplemental leads V7–V9, and for the Cabrera frontal plane lead grouping )
  - R-wave  $\geq 0.04$  s in V1–V2 and R/S  $\geq 1$  with a concordant positive T-wave in the absence of a conduction defect
  - Regional loss of viable myocardium based on imaging evidence of new or presumed new wall motion or perfusion deficit [e.g. echocardiography, left ventriculography during cardiac catheterization, radionuclide angiography, single-photon emission tomography, magnetic resonance imaging (MRI)].

In patients where recurrent myocardial infarction is suspected from clinical signs or symptoms following the initial infarction, recurrent infarction is diagnosed if there is a  $\geq 20\%$  increase of the value in the second cardiac biomarker sample.

### Procedure-Related MI

Percutaneous coronary interventions (PCI): for PCI in patients with normal baseline Troponin values, elevations of cardiac biomarkers above the 99th percentile URL are indicative of peri-procedural myocardial necrosis. By convention, increases of biomarkers greater than  $3 \times$  99th percentile URL have been designated as defining PCI-related myocardial infarction. A subtype related to a documented stent thrombosis is recognized. When Troponin is not available, CK-MB greater than  $3x$  upper limit of normal will be considered the threshold for myocardial infarction.

Coronary artery bypass grafting (CABG): for CABG in patients with normal baseline Troponin values, elevations of cardiac biomarkers above the 99th percentile URL are indicative of peri-procedural myocardial necrosis. By convention, increases of biomarkers greater than  $5 \times$  99th percentile URL plus either new pathological Q waves or new LBBB, or angiographically documented new graft or native coronary artery occlusion, or imaging evidence of new loss of viable myocardium have been designated as defining CABG-related myocardial infarction. When Troponin is not available, CK-MB greater than  $5x$  upper limit of normal will be considered the threshold for myocardial infarction.

Myocardial infarction associated with stent thrombosis: the definition criteria for spontaneous MI have to be fulfilled and associated with angiographic confirmation of stent thrombosis as described below based on ARC Definitions of Definite, Probable, and Possible Stent Thrombosis (Cutlip DE, S Windecker, R Mehran, A Boam, DJ

Cohen, G-A van Es, PG Steg, M-A Morel, L Mauri, P Vranckx, E McFadden, A Lansky, M Hamon, MW Krucoff, PW Serruys and on behalf of the Academic Research Consortium, 2007, Clinical End Points in Coronary Stent Trials: A Case for Standardized Definitions, *Circulation* 115:2344-2351).

#### *Definite Stent Thrombosis*

- Angiographic confirmation of stent thrombosis (The incidental angiographic documentation of stent occlusion in the absence of clinical signs or symptoms is not considered a confirmed stent thrombosis [silent occlusion]). The presence of a thrombus (Intracoronary thrombus) that originates in the stent or in the segment 5 mm proximal or distal to the stent and presence of at least 1 of the following criteria within a 48-hour time window:
  1. Acute onset of ischemic symptoms at rest
  2. New ischemic ECG changes that suggest acute ischemia
  3. Typical rise and fall in cardiac biomarkers (refer to definition of spontaneous MI: Troponin or CK-MB > 99th percentile of URL)
  4. Non occlusive thrombus  
Intracoronary thrombus is defined as a (spheric, ovoid, or irregular) non-calcified filling defect or lucency surrounded by contrast material (on 3 sides or within a coronary stenosis) seen in multiple projections, or persistence of contrast material within the lumen, or a visible embolization of intraluminal material downstream
  5. Occlusive thrombus  
TIMI 0 or TIMI 1 intrastent or proximal to a stent up to the most adjacent proximal side branch or main branch (if originates from the side branch)
- Pathological confirmation of stent thrombosis  
Evidence of recent thrombus within the stent determined at autopsy or via examination of tissue retrieved following thrombectomy



### *Probable Stent Thrombosis*

A probable stent thrombosis is considered to have occurred after intracoronary stenting in the following cases:

- Any unexplained death within the first 30 days
- Irrespective of the time after the index procedure, any MI that is related to documented acute ischemia in the territory of the implanted stent without angiographic confirmation of stent thrombosis and in the absence of any other obvious cause.

### *Possible Stent Thrombosis*

A possible stent thrombosis is considered to have occurred with any unexplained death from 30 days after intracoronary stenting until end of trial follow-up.

## **BIOMARKER-NEGATIVE ACS (UNSTABLE ANGINA)**

A diagnosis of a qualifying a biomarker-negative ACS event (UA) in a clinical setting consistent with myocardial ischemia will be defined by the following:

- No elevation in cardiac biomarkers (cardiac biomarkers are negative for myocardial necrosis)

and

- Chest discomfort or symptoms of myocardial ischemia ( $\geq 10$  minutes) at rest considered to be myocardial ischemia upon final diagnosis

and

- Prompting an unscheduled visit to a healthcare facility and Hospitalization (including chest pain observation units) within 24 hours of the most recent symptoms

And one of the following:

- a. New or worsening ST or T wave changes on resting ECG ST elevation: New transient (known to be < 20 minutes) ST elevation at the J-point in two contiguous leads with the cut-off points:  $\geq 0.2$  mV in men or  $\geq 0.15$  mV in women in leads V2-V3 and/or  $\geq 0.1$  mV in other leads ST depression and T-wave changes: New horizontal or down-sloping ST depression  $\geq 0.05$  mV in two contiguous leads; and/or T inversion  $\geq 0.1$  mV in two contiguous leads with prominent R-wave or R/S ratio > 1.
- b. Definite evidence of myocardial ischemia on myocardial scintigraphy (clear reversible perfusion defect) or stress echocardiography (reversible wall motion abnormality).
- c. Angiographic evidence of  $\geq 70\%$  lesion and/or thrombus in an epicardial coronary artery (native or by-pass graft) that is believed to be responsible for the myocardial ischemic symptoms/signs
- d. Need for coronary revascularization procedure (PCI or CABG) during the same hospital stay. This criteria would be fulfilled if the admission for myocardial ischemia lead to transfer to another institution for the revascularization procedure without interceding home discharge.

## NON-FATAL STROKE

Stroke is defined as the rapid onset of a new persistent neurologic deficit attributed to an obstruction in cerebral blood flow and/or cerebral hemorrhage with no apparent non-vascular cause (e.g., trauma, tumor, or infection). Available neuroimaging studies will be considered to support the clinical impression and to determine if there is a demonstrable lesion compatible with an acute stroke. Strokes will be classified as ischemic, hemorrhagic, or unknown.

For the diagnosis of stroke, the following 4 criteria should be fulfilled:

1. Rapid onset\* of a focal/global neurological deficit with at least one of the following:
  - Change in level of consciousness
  - Hemiplegia
  - Hemiparesis
  - Numbness or sensory loss affecting one side of the body
  - Dysphasia/Aphasia
  - Hemianopia (loss of half of the field of vision of one or both eyes)
  - Amaurosis fugax (transient complete/partial loss of vision of one eye)
  - Other new neurological sign(s)/symptom(s) consistent with stroke
  - Other new neurological sign(s)/symptom(s) consistent with stroke

\* If the mode of onset is uncertain, a diagnosis of stroke may be made provided that there is no plausible non-stroke cause for the clinical presentation.

2. Duration of a focal/global neurological deficit  $\geq$  24 hours or  $<$  24 hours if this is because of at least one of the following therapeutic interventions:
  - a. Pharmacologic (i.e., thrombolytic drug administration)
  - b. Non-pharmacologic [i.e., neurointerventional procedure (e.g. intracranial angioplasty)]or
  - c. Available brain imaging clearly documents a new hemorrhage or infarctor
  - d. The neurological deficit results in death
3. No other readily identifiable non-stroke cause for the clinical presentation (e.g., brain tumor, trauma, infection, hypoglycemia, peripheral lesion)
4. Confirmation of the diagnosis by at least one of the following:
  - a. Neurology or neurosurgical specialist
  - b. Brain imaging procedure (at least one of the following):
    - CT scan
    - MRI scan
    - Cerebral vessel angiography
  - c. Lumbar puncture (i.e. spinal fluid analysis diagnostic of intracranial hemorrhage)

If a stroke is reported but evidence of confirmation of the diagnosis by the methods outlined above is absent, the event will be forwarded for Phase II Review. In such cases, the event may be adjudicated as a stroke on the basis of the clinical presentation alone, but CEC consensus will be mandatory. If the acute focal signs represent a worsening of a previous deficit, these signs must have either:

- Persisted for more than one week, or
- Persisted for more than 24 hours and were accompanied by an appropriate new CT or MRI finding

Strokes are sub-classified as follows:

1. Ischemic (Non-hemorrhagic): a stroke caused by an arterial obstruction due to either a thrombotic (e.g., large vessel disease/atherosclerotic or small vessel disease/lacunar) or embolic etiology.
2. Hemorrhagic: a stroke due to a hemorrhage in the brain as documented by neuroimaging or autopsy. This category will include strokes due to primary intracerebral hemorrhage (intraparenchymal or

intraventricular), ischemic strokes with hemorrhagic transformation (i.e., no evidence of hemorrhage on an initial imaging study but appearance on a subsequent scan), subdural hematoma,\* and primary subarachnoid hemorrhage.

\*All subdural hematomas that develop during the clinical trial should be recorded and classified as either traumatic versus nontraumatic.

3. Unknown: the stroke type could not be determined by imaging or other means (e.g., lumbar puncture, neurosurgery, or autopsy) or no imaging was performed.

## **HOSPITALIZATION FOR HEART FAILURE**

Heart failure is defined as the development of signs and symptoms of congestive heart failure (CHF) not present at randomization and not due to other non-cardiac etiologies (e.g., acute renal failure, venous insufficiency, hepatic cirrhosis, pulmonary hypertension, etc.).

Heart failure (HF) requiring Hospitalization is defined as an event that meets the following criteria:

- a. Requires Hospitalization defined as an admission to an inpatient unit or a visit to an emergency department that results in at least a 24 hour stay (or a date change if the time of admission/discharge is not available).

And

- b. Clinical symptoms of heart failure including at least one of the following:

New or worsening

- dyspnea
- orthopnea
- paroxysmal nocturnal dyspnea

And

- c. Physical signs of heart failure, including at least one of the following:

- edema (greater than 2+ lower extremity)
- pulmonary crackles greater than basilar (pulmonary edema must be sufficient to cause tachypnea and distress not occurring in the context of an acute myocardial infarction or as the consequence of an arrhythmia occurring in the absence of worsening heart failure)
- estimated jugular venous distension > 10 cm
- tachypnea (respiratory rate > 20 breaths/minute)

And

- d. Laboratory Values, including at least one of the following:

- Chest X-Ray consistent with congestion
- Left ventricular ejection fraction < 0.4 within 6 months

NOTE: Biomarker results (e.g., brain natriuretic peptide (BNP)) consistent with congestive heart failure will be supportive of this diagnosis, but the elevation in BNP cannot be due to other conditions such as cor pulmonale, pulmonary embolus, primary pulmonary hypertension, or congenital heart disease.

And

- e. Additional/Increased therapy

Initiation of, or an increase in, treatment directed at heart failure or occurring in a patient already receiving maximal therapy for heart failure and including at least two of the following:

- Initiation of intravenous diuretic, inotrope, or vasodilator therapy or significant augmentation of therapy
- Uptitration of intravenous therapy, if already on therapy
- Continuous oxygen administration or confinement to bed predominantly due to heart failure symptoms (or both)
- Initiation of mechanical or surgical intervention (mechanical circulatory support, heart transplantation or ventricular pacing to improve cardiac function), or the use of ultrafiltration, hemofiltration, or dialysis that is specifically directed at treatment of heart failure.

And

- f. No other non-cardiac etiology (such as chronic obstructive pulmonary disease, hepatic cirrhosis, acute renal failure, or venous insufficiency) and no other cardiac etiology (such as pulmonary embolus, cor pulmonale, primary pulmonary hypertension, or congenital heart disease) for signs or symptoms is identified.

NOTE: It is recognized that some patients may have multiple simultaneous disease processes. Nevertheless, for the endpoint event of heart failure requiring hospitalization, the diagnosis of congestive heart failure would need to be the primary disease process accounting for the above signs and symptoms.

Or

Cardiogenic shock not occurring in the context of an acute myocardial infarction or as the consequence of an arrhythmia occurring in the absence of worsening heart failure. Cardiogenic shock is defined as systolic blood pressure (SBP)  $< 90$  mm Hg for greater than 1 hour, not responsive to fluid resuscitation and/or heart rate correction, and felt to be secondary to cardiac dysfunction and associated with at least one of the following signs of hypoperfusion:

- Cool, clammy skin or
- Oliguria (urine output  $< 30$  mL/hour) or
- Altered sensorium or
- Cardiac index  $< 2.2$  L/min/m<sup>2</sup>

Cardiogenic shock can also be defined as SBP  $\geq 90$  mm Hg as a result of positive inotropic or vasopressor agents alone and/or with mechanical support in less than 1 hour. The outcome of cardiogenic shock will be based on CEC assessment and must occur after randomization. Episodes of cardiogenic shock occurring before and continuing after randomization will not be part of the study endpoint.

eFigure 1. Hazard Ratios for Primary Endpoint in Subgroups

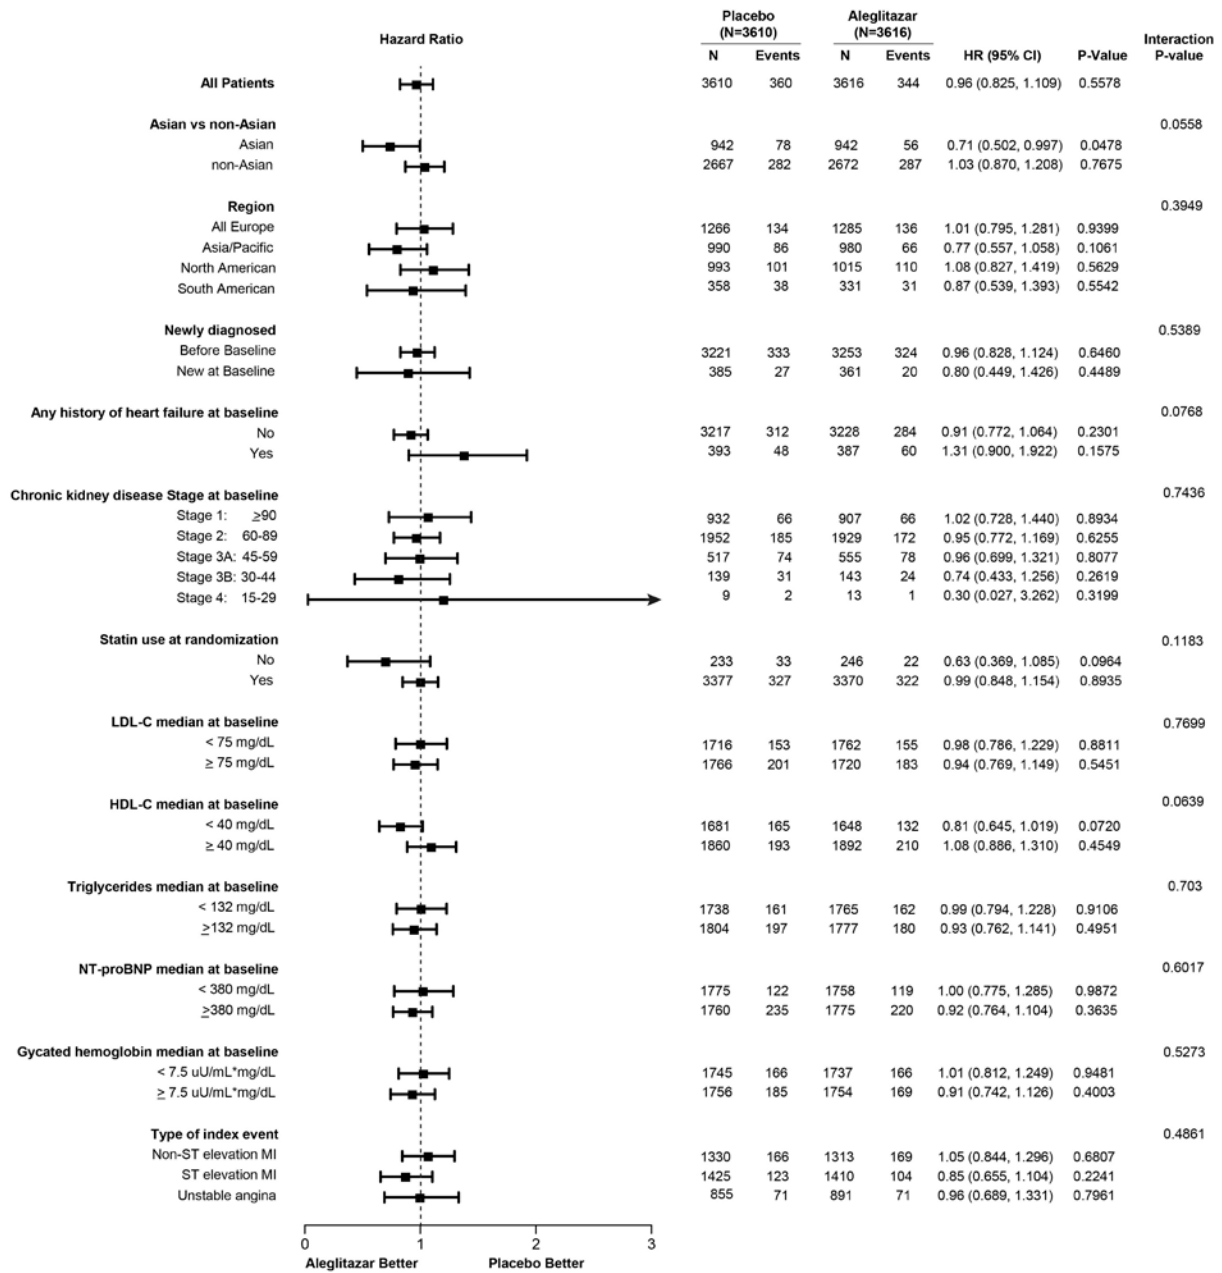

**eFigure 2. Gastrointestinal Hemorrhages**

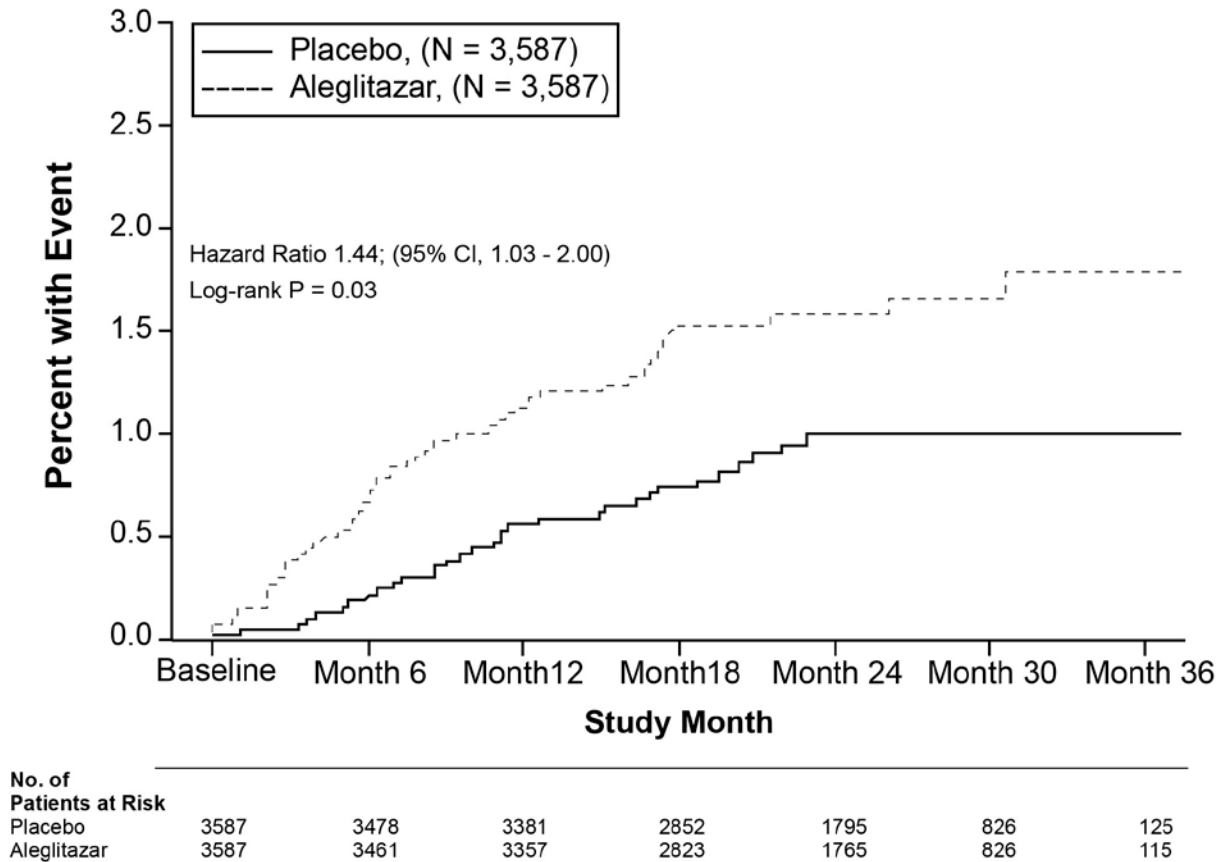

Cumulative Kaplan-Meier Estimates of Time to First Occurrence of Gastrointestinal Hemorrhage Includes only patients who received at least one dose of study drug and according to drug actually received.

**eFigure 3. Bone Fractures**

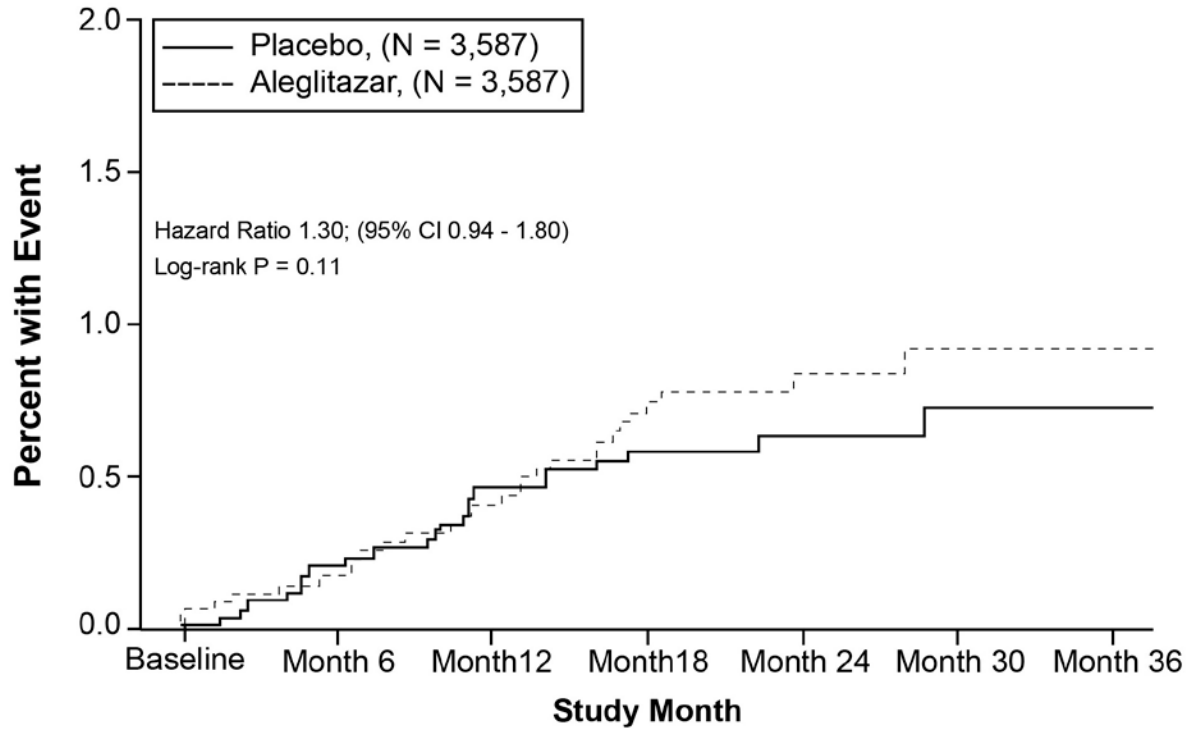

| No. of Patients at Risk |  | Baseline | Month 6 | Month 12 | Month 18 | Month 24 | Month 30 | Month 36 |
|-------------------------|--|----------|---------|----------|----------|----------|----------|----------|
| Placebo                 |  | 3587     | 3477    | 3383     | 2859     | 1799     | 820      | 124      |
| Aleglitazar             |  | 3587     | 3478    | 3381     | 2842     | 1769     | 819      | 113      |

Cumulative Kaplan-Meier Estimates of Time to First Occurrence of Bone Fracture  
Includes only patients who received at least one dose of study drug and according to drug actually received.
